# Supplementary material for: Detection of p53 aggregates in plasma of glioma patients
Source: Springer Nature journal article supplement (doi:10.1038/s43856-025-00918-3), 2025-05-23
Supplement: MOESM1 [file 43856_2025_918_MOESM1_ESM.pdf]

## **Supplementary Information**

### **Detection of p53 aggregates in plasma of glioma patients**

Yunzhao Wu<sup>1,2</sup>, Jeff Y.L. Lam<sup>1,2</sup>, Matthaios Pitoulas<sup>3</sup>, Dorothea Böken<sup>1,2</sup>, Ziwei Zhang<sup>1,2</sup>, Renuka Chintapalli<sup>3</sup>, Emre Fertan<sup>1,2</sup>, Zengjie Xia<sup>1,2</sup>, John S.H. Danial<sup>1,2</sup>, Gemma Tsang-Pells<sup>3</sup>, Emily Fysh<sup>3</sup>, Linda Julian<sup>1,4</sup>, Kevin M. Brindle<sup>4</sup>, Richard Mair<sup>3,4\*</sup>, David Klenerman<sup>1,2\*</sup>.

1 Yusuf Hamied Department of Chemistry, University of Cambridge, Cambridge CB2 1EW, United Kingdom

2 UK Dementia Research Institute, University of Cambridge, Cambridge CB2 0AH, United Kingdom

3 Department of Clinical Neurosciences, University of Cambridge, Cambridge CB2 0QQ, United Kingdom

4 Cancer Research UK Cambridge Institute, University of Cambridge, Cambridge CB2 0RE, United Kingdom

\*Co-corresponding authors

**Supplementary Table S1.** Diagnoses of the control group.

| Disease                              | Number of controls |
|--------------------------------------|--------------------|
| Cerebral artery aneurysm, unruptured | 3                  |
| Cervical myelopathy                  | 4                  |
| Hydrocephalus                        | 3                  |
| Lumbar radiculopathy                 | 10                 |
| Parkinson's disease                  | 1                  |
| Trigeminal neuralgia                 | 1                  |

**Supplementary Table S2.** Lower detection limit and AEB range for different detector-SBG combinations.

| Entry | PAb240<br>detector<br>concentration<br>( $\mu\text{g/mL}$ ) | SBG<br>concentration<br>(pM) | Lower limit<br>of detection<br>(pM) | AEB at<br>highest<br>calibrator<br>concentration | Background<br>AEB |
|-------|-------------------------------------------------------------|------------------------------|-------------------------------------|--------------------------------------------------|-------------------|
| 1     | 0.3                                                         | 50                           | 10.17                               | 0.63                                             | 0.0060            |
| 2     | 0.3                                                         | 150                          | 11.03                               | 0.84                                             | 0.0098            |
| 3     | 0.3                                                         | 300                          | 10.35                               | 1.10                                             | 0.0136            |
| 4     | 0.5                                                         | 50                           | 9.78                                | 0.75                                             | 0.0068            |
| 5     | 0.5                                                         | 150                          | 11.85                               | 0.89                                             | 0.0115            |
| 6     | 0.5                                                         | 300                          | 15.41                               | 1.14                                             | 0.0179            |
| 7     | 1.0                                                         | 50                           | 10.35                               | 0.88                                             | 0.0100            |
| 8     | 1.0                                                         | 150                          | 7.98                                | 1.13                                             | 0.0124            |
| 9     | 1.0                                                         | 300                          | 18.84                               | 1.12                                             | 0.0269            |



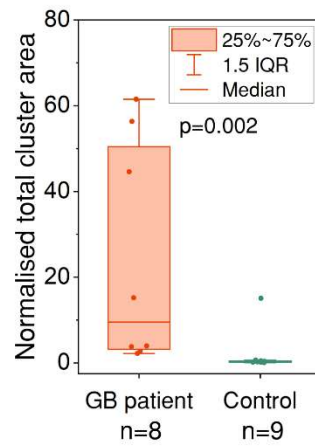

**Supplementary Figure S2.** Normalised total cluster area in the super-resolution images of GB patients and controls. The data were normalised to the corresponding values of the blank wells on the same coverslip.

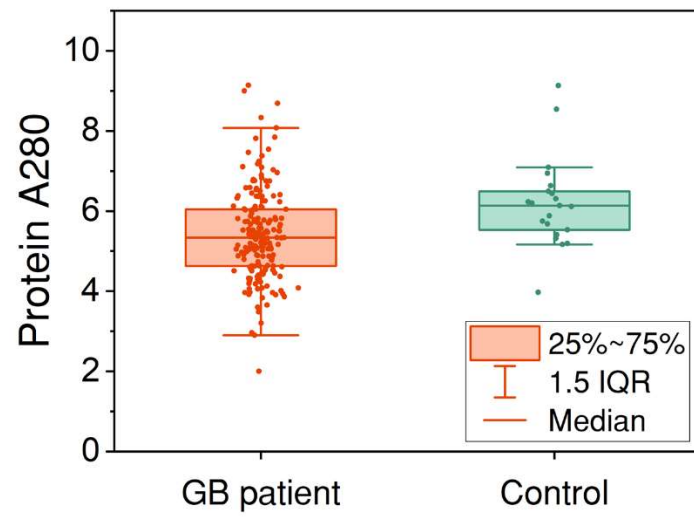

**Supplementary Figure S3.** Protein A280 of the GBM patient and control plasma samples.

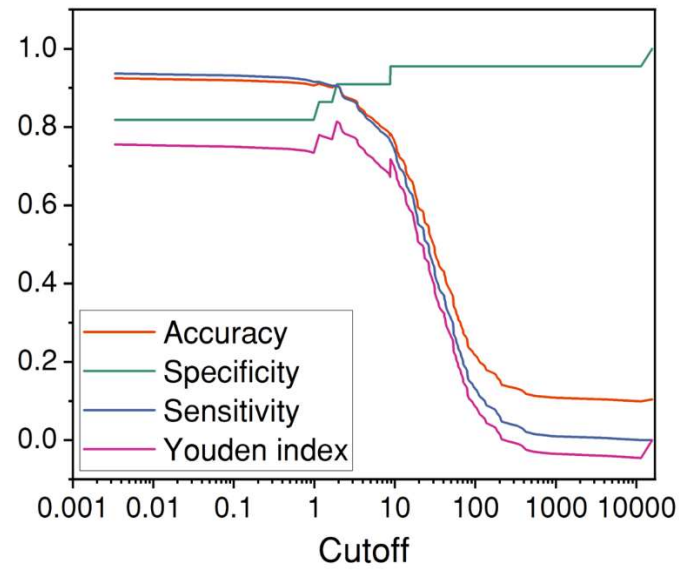

**Supplementary Figure S4.** Diagnostic accuracy, specificity, sensitivity, and Youden indices at different cut-offs.

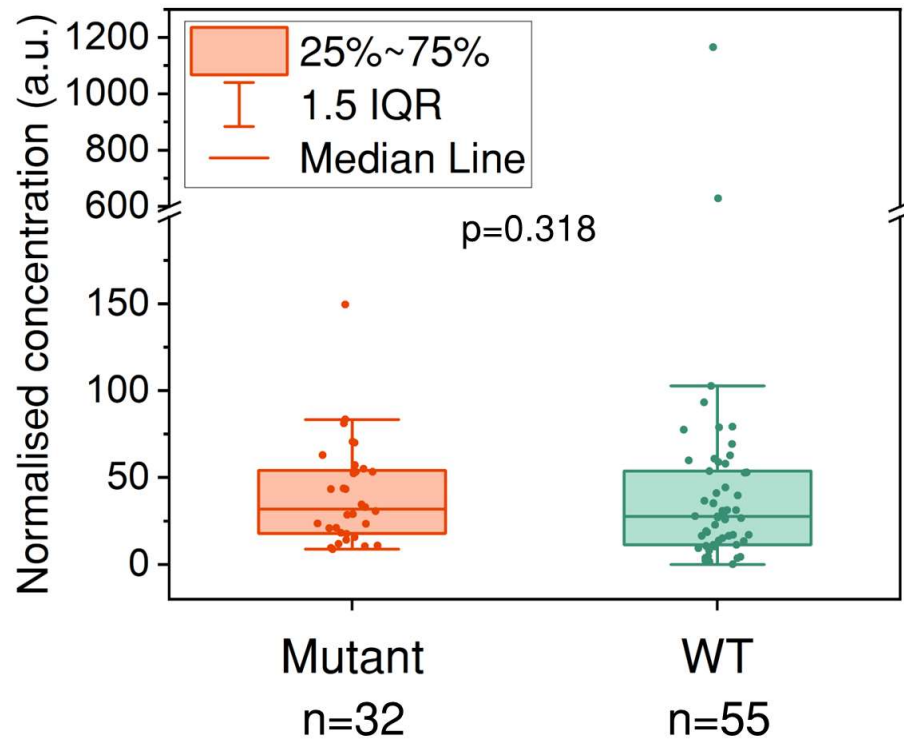

**Supplementary Figure S5.** Comparison between normalised p53 aggregate concentrations in the plasma samples of GB patients with mutant and WT *TP53*. The p53 aggregate concentrations were normalised by the total protein concentration in the plasma samples (as in protein A280).



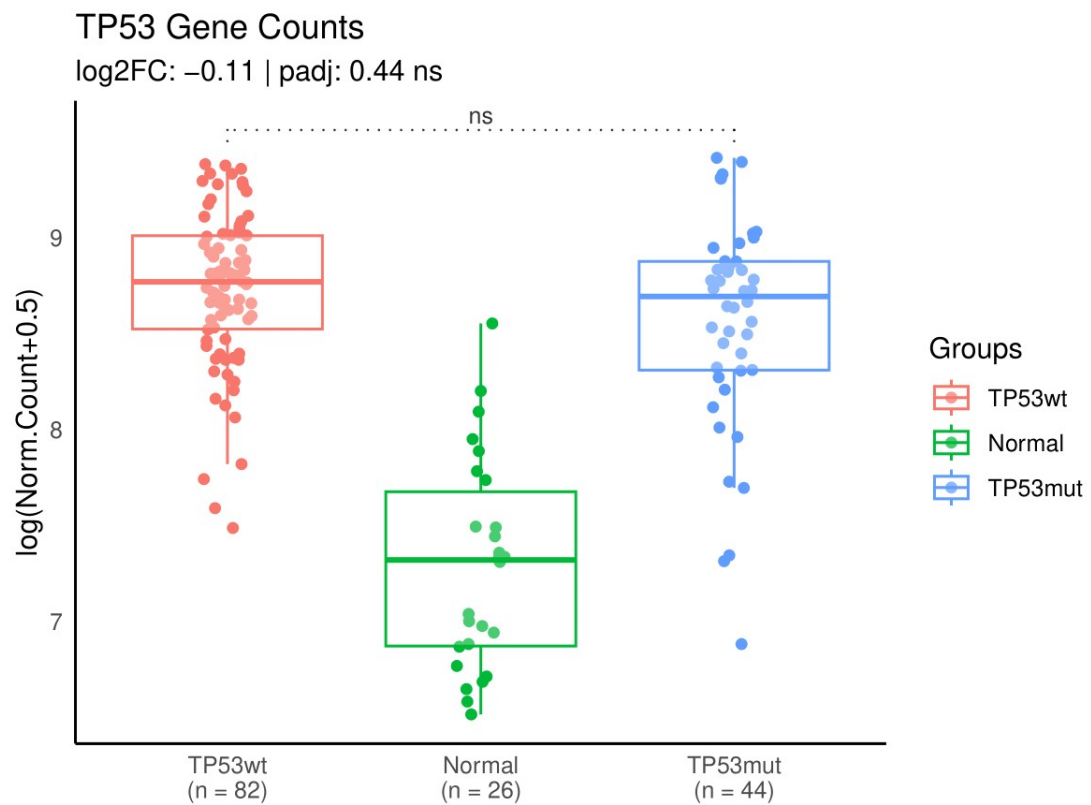

**Supplementary Figure S6.** Levels of p53 transcripts in GB patients' tumour and normal brain tissue samples. There was no difference between tumour samples with WT and mutant *TP53*. The p53 transcript levels in the normal brain tissue were significantly lower than those in the tumour tissue.

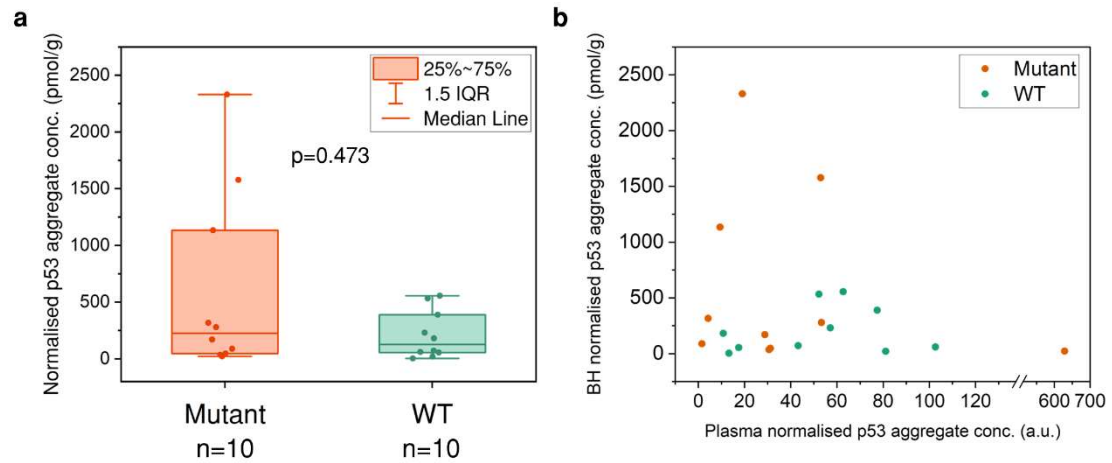

**Supplementary Figure S7.** P53 aggregate concentrations in brain homogenate samples. (a) Comparison between normalised p53 aggregate concentrations in the brain homogenate samples of GB patients with mutant and WT *TP53*. The p53 aggregate concentrations (pM) were normalised by total protein concentration in the brain homogenate samples (as measured by BCA method, in mg/mL). (b) No significant correlation was found between the p53 aggregate concentrations in the brain homogenate and plasma of the same patient (Pearson correlation  $p=0.477$ , Spearman correlation  $p=0.622$ ). Each point represents one patient. BH, brain homogenate.
